# Supplementary material
Source: Elsevier journal article supplement (https://rcastoragev2.blob.core.windows.net/220e562562e3926d9452e11b30e174d7/mmc1.pdf)
Supplement: mmc1 [file mmc1.pdf]

## Supplemental Information

### Nonconventional Initiation Complex Assembly

#### by STAT and NF- $\kappa$ B Transcription Factors

#### Regulates Host Defense Genes

Matthias Farlik, Benjamin Reutterer, Christian Schindler, Florian Greten, Claus Vogl, Mathias Müller, and Thomas Decker

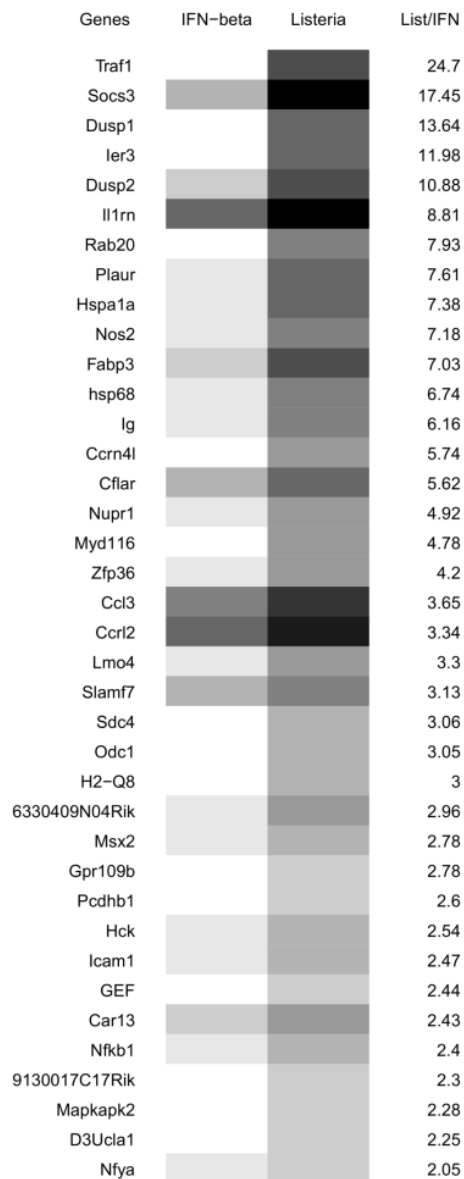

**Figure S1.** Microarray analysis of genes induced in macrophages by IFN- $\beta$  treatment or infection with *Listeria monocytogenes*. Infection produces the IFN- $\beta$  signal as well as additional signals from pattern recognition receptors. IFN- $\beta$  -induced genes were further examined for increased expression in Listeria-infected cells. The 38 genes showing the highest increase of Listeria-induced expression over IFN- $\beta$  treatment alone are shown. First column: gene symbol; second column: gray-scale indicating induction after IFN- $\beta$  treatment; third column: gray-scale indicating induction after Listeria treatment; fourth column: ratio of induction after Listeria infection to induction after IFN- $\beta$  treatment. The gray-scale intensity corresponds to values equally spaced on the log-scale from white (lowest induction of absolute ratio of 1.40) to black (highest induction of absolute ratio of 207.11).

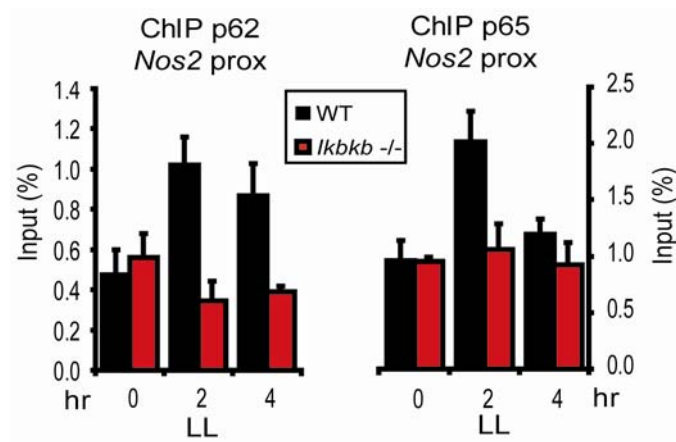

**Figure S2.** TFIIH-p62 remains at the *Nos2* promoter after binding of NF- $\kappa$ B-p65 decreases. Bone marrow-derived macrophages from wild-type mice (black bars) or *Rela*<sup>-/-</sup> mice (red bars) were infected with living *L. monocytogenes* (LL) for 4hr or 6hr. The cells were processed for ChIP using antibodies against TFIIH-p62 (left panel) or NF- $\kappa$ B-p65 (right panel). The precipitated DNA was analyzed by q-PCR with primers amplifying the proximal *Nos2* promoter region. Error bars represent standard deviations from triplicate samples. The experiment was repeated at least three times.
